# Supplementary material
Source: PubMed Central journal article supplement (PMC4080848)
Supplement: Supp_Fig2.pdf [file Supp_Fig2.pdf]

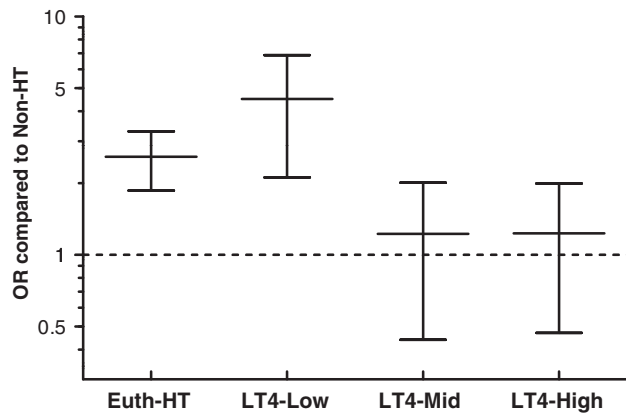

**SUPPLEMENTARY FIG. S2.** Odds ratios and 95% confidence intervals for differentiated thyroid cancer, conferred by the different subgroups of subjects affected by Hashimoto thyroiditis compared to the Non-HT population, after exclusion of subjects with preoperative diagnosis of thyroid cancer. Euth-HT and LT<sub>4</sub>-Low subgroups have a significantly increased odds ratio for differentiated thyroid cancer, while the LT<sub>4</sub>-Mid and LT<sub>4</sub>-High subgroups do not confer such a risk. Non-HT, subjects without Hashimoto's thyroiditis; Euth-HT, euthyroid patients with Hashimoto's thyroiditis; LT<sub>4</sub>, hypothyroid patients on levothyroxine replacement; Low/Mid/High, tertiles of levothyroxine replacement dose (see text for details).
