# Supplementary material
Source: PubMed Central journal article supplement (PMC4080848)
Supplement: Supp_Fig3.pdf [file Supp_Fig3.pdf]

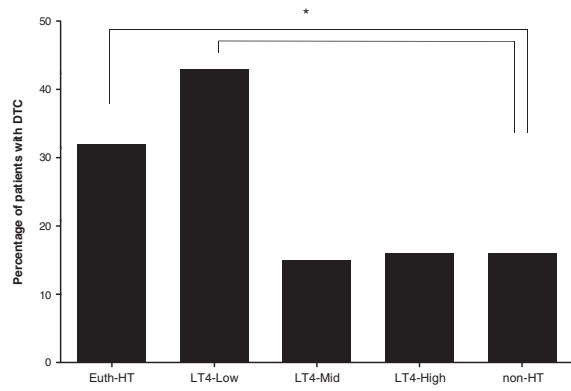

**SUPPLEMENTARY FIG. S3.** Frequency of differentiated thyroid cancer in the different patient groups, after exclusion of subjects with preoperative diagnosis of thyroid cancer. the highest risk for DTC is found in the Euth-HT and the LT<sub>4</sub>-Low groups. \*Frequency significantly higher compared to the Non-HT group. Fisher's exact test  $p < 0.001$ . DTC, differentiated thyroid carcinoma; Non-HT, subjects without Hashimoto's thyroiditis; Euth-HT, euthyroid patients with Hashimoto's thyroiditis; LT<sub>4</sub>, hypothyroid patients on levothyroxine replacement.
