# Supplementary material
Source: PubMed Central journal article supplement (PMC4080848)
Supplement: Supp_Table1.pdf [file Supp_Table1.pdf]

SUPPLEMENTARY TABLE S1. PATIENTS CHARACTERISTICS

|                           | <i>Non-HT</i> | <i>Euth-HT</i>         | <i>Hypo-HT</i>            |                           |                            |
|---------------------------|---------------|------------------------|---------------------------|---------------------------|----------------------------|
|                           |               |                        | <i>LT<sub>4</sub>-Low</i> | <i>LT<sub>4</sub>-Mid</i> | <i>LT<sub>4</sub>-High</i> |
| <i>n</i> Total            | 1770          | 271                    | 47                        | 52                        | 57                         |
| <i>n</i> Male             | 404 (23)      | 31 (11)                | 6 (13)                    | 4 (8)                     | 5 (9)                      |
| <i>n</i> Female           | 1366 (77)     | 240 (89) <sup>a</sup>  | 39 (87)                   | 52 (92) <sup>a</sup>      | 52 (81) <sup>a</sup>       |
| Age                       | 49.0±17.3     | 46.5±14.9              | 49.2±12.7                 | 48.6±12.9                 | 47.1±13.7                  |
| TSH (mIU/L)               | 1.4±3.1       | 2.3±1.5 <sup>a,b</sup> | 3.7±2.9 <sup>a</sup>      | 3.7±9.7 <sup>a</sup>      | 2.8±4.2 <sup>a,b</sup>     |
| FT <sub>4</sub> (ng/dL)   | 1.1±0.5       | 1.0±0.3 <sup>a</sup>   | 1.0±0.1                   | 1.1±0.3 <sup>b,c</sup>    | 1.1±0.2 <sup>a,b,c</sup>   |
| Disease duration (months) | —             | —                      | 79±86                     | 88±63                     | 109±96                     |

Data are reported as means ± standard deviation, or *n*, followed by the percentage in parenthesis.

<sup>a</sup>*p* < 0.05 vs. Non-HT.

<sup>b</sup>*p* < 0.05 vs. LT<sub>4</sub>-Low.

<sup>c</sup>*p* < 0.05 vs. Euth-HT.

Non-HT, subjects without Hashimoto's thyroiditis; Euth-HT, euthyroid patients with Hashimoto's thyroiditis; Hypo-HT, hypothyroid patients with Hashimoto's thyroiditis; LT<sub>4</sub>, hypothyroid patients on levothyroxine replacement; Low/Mid/High, tertiles of levothyroxine replacement dose (see text for details); TSH, thyrotropin; FT<sub>4</sub>, free thyroxine.
