# Supplementary material
Source: PubMed Central journal article supplement (PMC4080848)
Supplement: Supp_Table2.pdf [file Supp_Table2.pdf]

SUPPLEMENTARY TABLE S2. ASSOCIATION OF HASHIMOTO'S THYROIDITIS AND DIFFERENTIATED THYROID CANCER

|                       | <i>Non-DTC n (%)</i>   | <i>DTC n (%)</i> | <i>Total n (%)</i> | <i>Relative risk (95% CI)</i> |
|-----------------------|------------------------|------------------|--------------------|-------------------------------|
| Non-HT                | 1482 (84)              | 188 (16)         | 1770 (100)         | —                             |
| Euth-HT               | 183 (68)               | 88 (32)          | 271 (100)          | 1.16 (1.10–1.23) <sup>a</sup> |
| Hypo-HT               |                        |                  |                    |                               |
| LT <sub>4</sub> -Low  | 27 (57) <sup>b</sup>   | 20 (43)          | 47 (100)           | 1.05 (1.02–1.08) <sup>a</sup> |
| LT <sub>4</sub> -Mid  | 44 (85) <sup>b,c</sup> | 8 (15)           | 52 (100)           | 1.00 (0.98–1.02)              |
| LT <sub>4</sub> -High | 48 (84) <sup>b,c</sup> | 9 (16)           | 57 (100)           | 1.00 (0.98–1.02)              |

Relative risk is calculated compared to the Non-HT group.

<sup>a</sup>Fisher's exact test  $p < 0.001$ .

<sup>b</sup>Fisher's exact test  $p < 0.05$  vs. Euth-HT.

<sup>c</sup>Fisher's exact test  $p < 0.001$  vs. LT<sub>4</sub>-Low.

Non-HT, subjects without Hashimoto's thyroiditis; Euth-HT, euthyroid patients with Hashimoto's thyroiditis; Hypo-HT, hypothyroid patients with Hashimoto's thyroiditis; LT<sub>4</sub>, hypothyroid patients on levothyroxine replacement; Low/Mid/High, tertiles of levothyroxine replacement dose; DTC, differentiated thyroid cancer (see text for details); CI, confidence interval.
