# Supplementary material
Source: PubMed Central journal article supplement (PMC4080848)
Supplement: Supp_Table3.pdf [file Supp_Table3.pdf]

SUPPLEMENTARY TABLE S3. DIFFERENTIATED THYROID CANCER AND THYROPEROXIDASE ANTIBODY STATUS

|                                             | <i>Non-DTC n (%)</i> | <i>DTC n (%)</i> | <i>Total n (%)</i> | <i>Relative risk (95% CI)</i> |
|---------------------------------------------|----------------------|------------------|--------------------|-------------------------------|
| Non-HT                                      | 1482 (84)            | 288 (16)         | 1770 (100)         | —                             |
| Euth-HT<br>TPO-High                         | 31 (62)              | 19 (38)          | 50 (100)           | 1.04 (1.01–1.08) <sup>a</sup> |
| Euth-HT<br>TPO-Low/Neg                      | 52 (63)              | 30 (37)          | 82 (100)           | 1.07 (1.03–1.11) <sup>a</sup> |
| Hypo-HT<br>LT <sub>4</sub> -Low<br>TPO-High | 14 (64)              | 8 (36)           | 22 (100)           | 1.02 (1.00–1.04) <sup>b</sup> |
| LT <sub>4</sub> -Low<br>TPO-Low/Neg         | 1 (13)               | 7 (87)           | 8 (100)            | 1.02 (1.01–1.04) <sup>a</sup> |
| LT <sub>4</sub> -Mid<br>TPO-High            | 15 (94)              | 1 (60)           | 16 (100)           | 0.99 (0.99–1.00)              |
| LT <sub>4</sub> -Mid<br>TPO-Low/Neg         | 6 (60)               | 4 (40)           | 10 (100)           | 1.00 (1.00–1.02)              |
| LT <sub>4</sub> -High<br>TPO-High           | 18 (957)             | 1 (5)            | 19 (100)           | 0.99 (0.98–1.00)              |
| LT <sub>4</sub> -High<br>TPO-Low/Neg        | 7 (70)               | 3 (30)           | 10 (100)           | 1.01 (0.99–1.02)              |

Relative risk is calculated compared to the Non-HT group by Fisher's exact test.

<sup>a</sup>Fisher's exact test  $p < 0.001$ .

<sup>b</sup>Fisher's exact test  $p < 0.05$ .

TPO, thyroid peroxidase antibodies; TPO-High, TPO antibodies titer > 1:1000; TPO-Low/Neg, TPO antibodies titer < 1:1000 or undetectable (negative); Non-HT, subjects without Hashimoto's thyroiditis; Euth-HT, euthyroid patients with Hashimoto's thyroiditis; Hypo-HT, hypothyroid patients with Hashimoto's thyroiditis; LT<sub>4</sub>, hypothyroid patients on levothyroxine replacement; Low/Mid/High, tertiles of levothyroxine replacement dose; DTC, differentiated thyroid cancer (see text for details); CI, confidence interval.
